# Supplementary material for: RNA-Guided CRISPR-Cas9 System-Mediated Engineering of Acute Myeloid Leukemia Mutations
Source: PubMed Central journal article supplement — Mol Ther Nucleic Acids. 2017 Jan 12;6:243–8. doi: 10.1016/j.omtn.2016.12.012 (PMC5363507; doi:10.1016/j.omtn.2016.12.012), 2017-01-12
Supplement: mmc1.pdf [file mmc1.pdf]

**OMTN, Volume 6**

**Supplemental Information**

**RNA-Guided CRISPR-Cas9 System-Mediated  
Engineering of Acute Myeloid Leukemia Mutations**

**Oliver Brabetz, Vijay Alla, Linus Angenendt, Christoph Schliemann, Wolfgang E. Berdel, Maria-Francisca Arteaga, and Jan-Henrik Mikesch**

Supplementary Information:

| sgRNA                    | sequence                  |
|--------------------------|---------------------------|
| IDH 2 sgRNA 1 top        | CACCGAACTATCCGGAACATCCTG  |
| IDH 2 sgRNA 1 bot        | AAACCAGGATGTTCCGGATAGTTC  |
| IDH 2 sgRNA 2 top        | CACCGGAACTATCCGGAACATCCT  |
| IDH 2 sgRNA 2 bot        | AAACAGGATGTTCCGGATAGTTCC  |
| IDH 2 sgRNA 3 top        | CACCGTGGAACTATCCGGAACATCC |
| IDH 2 sgRNA 3 bot        | AAACGGATGTTCCGGATAGTTCCAC |
| mutant IDH 2 sgRNA 1 top | CACCGAACTATCCAGAACATCCTG  |
| mutant IDH 2 sgRNA 1 bot | AAACCAGGATGTTCTGGATAGTTC  |

**Table S1.** sgRNA sequences. Small guide (sg) RNAs according to published criteria mapping to different introns/exons of the gene IDH2.

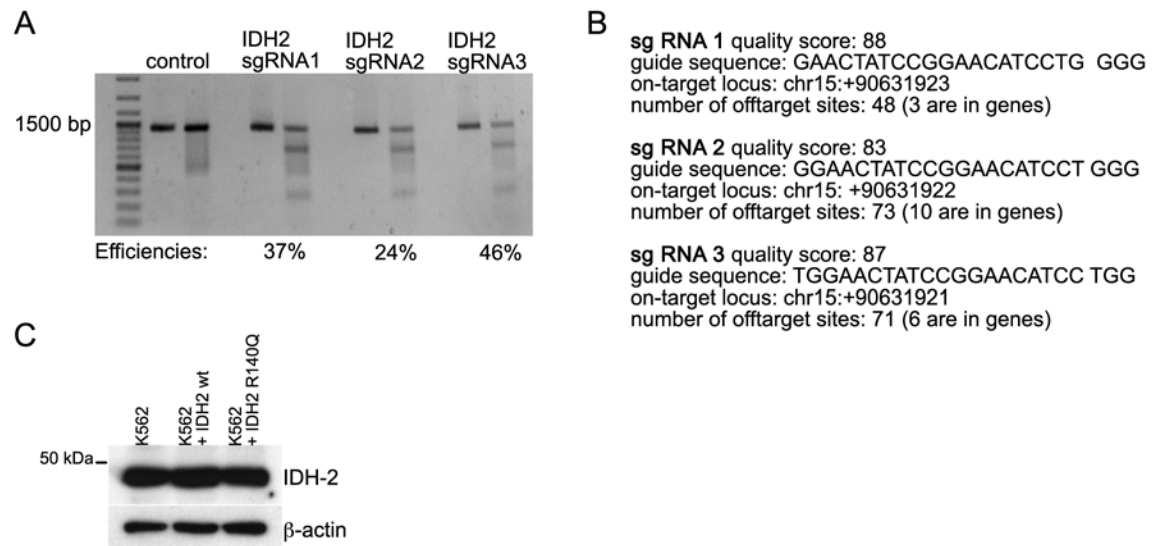

**Figure S1.** A) Surveyor nuclease assay for detection of indels induced by sgRNAs 1-3. B) Analysis for off-target sites of sgRNAs 1-3 using the website [www.crispr.mit.edu](http://www.crispr.mit.edu) (Zhang lab, MIT 2015). C) Western blot analysis showing IDH2 protein expression levels in human K562 leukemia cells before and after successful genome editing as indicated.
